# Supplementary material for: The mystery of COVID-19 reinfections: A global systematic review and meta-analysis of 577 cases
Source: bioRxiv or medRxiv preprint supplement (doi:10.1101/2021.07.22.21260972), 2021-07-25

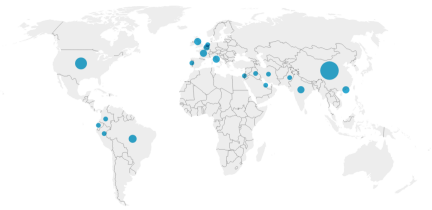

Supplement: Supplementary file [file media-3.pdf]
